# Supplementary material
Source: PubMed Central journal article supplement (PMC7045699)
Supplement: NIHMS1552563-supplement-SI.pdf [file NIHMS1552563-supplement-SI.pdf]

# Supplementary Information

## Probing the Conformational and Energy Landscapes of KRAS membrane orientation

Priyanka Prakash<sup>1</sup> and Alemayehu A. Gorfe<sup>1,2\*</sup>

<sup>1</sup> McGovern Medical School, University of Texas Health Science Center at Houston, Department of Integrative Biology and Pharmacology, 6431 Fannin St., Houston, Texas 77030

<sup>1,2</sup> MD Anderson Cancer Center UTHealth Graduate School of Biomedical Sciences, Houston, Texas, 77030, USA.

\*Correspondence to: [Alemayehu.g.abebe@uth.tmc.edu](mailto:Alemayehu.g.abebe@uth.tmc.edu)

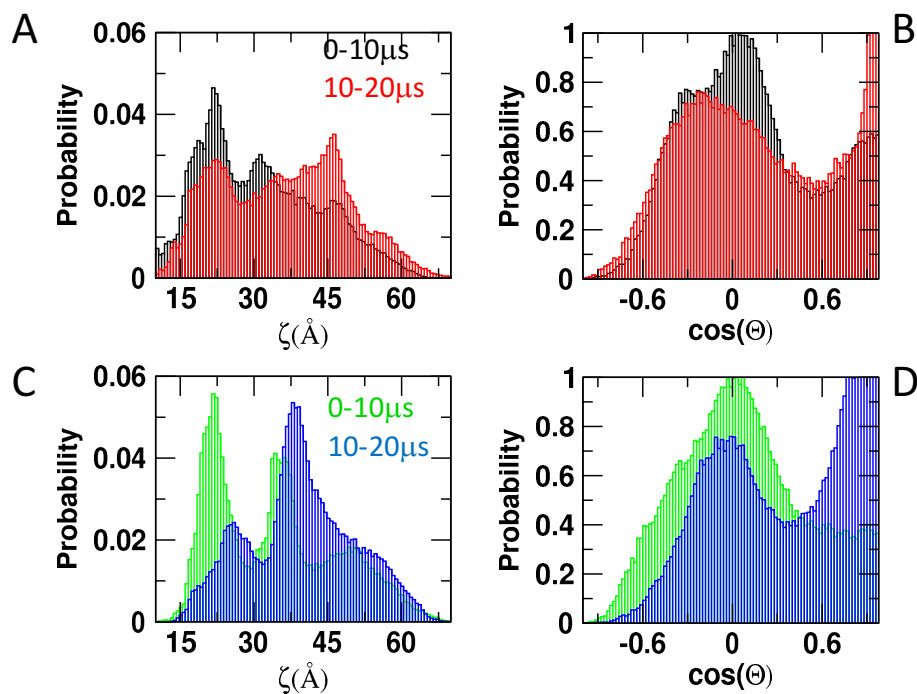

**Figure S1:** Conformational fluctuations of membrane-bound G12D (A & C) and Q61H (B & D) KRAS mutants during the first- and second-halves of a 20 μs MD simulation. (A, B) Normalized histograms of  $\zeta$  (distance between the C $\alpha$  atoms of D132 and T183). (C, D) Normalized histograms of  $\cos(\Theta)$  (cosine of the angle between a vector along beta-strand 1 (residues 5-9) and the membrane normal).
